# Supplementary material for: The Role of Lipids in Parkinson’s Disease
Source: PubMed Central journal article supplement (PMC6356353; doi:10.3390/cells8010027), 2019-01-07
Supplement: cells-08-00027-s001.pdf [file cells-08-00027-s001.pdf]

**Supplementary Table S1.** Lipid and lipoprotein levels in human PD body fluids and tissues, and their effects in animal/cellular models. (=) No differences between PD patients and controls; (≠) Discordant between multiple studies; (↑) Increased in PD patients compared to controls; (↓) Decreased in PD patients compared to controls; (+) Positive effect on PD animal/cellular models; (-) Negative effect on PD animal/cellular models; (DA) Effect on dopaminergic neurons; <sup>a</sup> Lipid rafts studies; <sup>b</sup> Cytosolic fraction studies; CSF, Cerebrospinal fluid.

|                                 | Intake | Plasma | CSF | Brain |                                 |            |                               |                             |         |                     |                    | Animal/<br>cellular<br>models |
|---------------------------------|--------|--------|-----|-------|---------------------------------|------------|-------------------------------|-----------------------------|---------|---------------------|--------------------|-------------------------------|
|                                 |        |        |     | Brain | Anterior<br>cingulate<br>cortex | Cerebellum | Frontal<br>cortex             | Primary<br>visual<br>cortex | Putamen | Substantia<br>nigra | Temporal<br>cortex |                               |
| <b>Fatty acyls</b>              |        |        |     |       |                                 |            |                               |                             |         |                     |                    |                               |
| SFA                             | =      |        |     |       |                                 |            | ↑ <sup>a</sup>                |                             |         |                     | =                  | + -                           |
| MUFA                            | ≠      |        |     |       |                                 |            |                               |                             |         |                     | =                  | DA                            |
| PUFA                            |        |        |     |       | ↑                               |            |                               | =                           |         |                     | =                  | +                             |
| <i>Omega-3</i>                  | ↓      |        |     |       |                                 |            |                               |                             |         |                     |                    | +                             |
| ALA                             | ↓      | ↓      |     |       |                                 |            |                               |                             |         |                     |                    |                               |
| EPA                             |        |        |     |       |                                 |            |                               |                             |         |                     |                    | +                             |
| DHA                             |        |        |     |       |                                 |            | ↓ <sup>a</sup> ↑ <sup>b</sup> |                             |         |                     |                    | +                             |
| <i>Omega-6</i>                  | ≠      |        |     |       |                                 |            |                               |                             |         |                     |                    |                               |
| LA                              | ≠      | ↓      |     |       |                                 |            | ↓ <sup>b</sup>                |                             |         |                     |                    | ↑ +                           |
| AA                              | ≠      | ↓      | ↑   |       |                                 |            | ↓ <sup>a</sup> = <sup>b</sup> |                             |         |                     |                    | ↑ +                           |
| <b>Eicosanoids</b>              |        |        |     |       |                                 |            |                               |                             |         |                     |                    |                               |
| <i>Prostaglandins</i>           |        |        | =   |       |                                 |            |                               |                             |         | ↑                   |                    | ↑ + -                         |
| <i>Leukotriens</i>              |        |        |     |       |                                 |            |                               |                             |         |                     |                    | -                             |
| <i>Epoxyeicosatrienoic acid</i> |        |        |     |       |                                 |            |                               |                             |         |                     |                    | +                             |
| <i>Isoprostanes</i>             |        | ≠      | =   |       | ↑                               |            |                               |                             |         | =                   |                    |                               |
| Carnitine                       |        | ↓      |     |       |                                 |            |                               |                             |         |                     |                    | +                             |
| Acylcarnitine                   |        | ≠      | =   |       |                                 |            |                               |                             |         |                     |                    | +                             |
| <b>Glycerolipids</b>            |        |        |     |       |                                 |            |                               |                             |         |                     |                    |                               |
| MAG                             |        |        |     |       |                                 |            |                               |                             |         |                     |                    | +**                           |
| <b>Endocannabinoids</b>         |        |        |     |       |                                 |            |                               |                             |         |                     |                    |                               |
| <i>Anandamide</i>               |        |        | ↑   |       |                                 |            |                               |                             |         |                     |                    | +                             |
| 2-AG                            |        |        |     |       |                                 |            |                               |                             |         |                     |                    | ↑ +                           |
| CB1R                            |        |        |     |       |                                 |            |                               |                             | ↑       |                     |                    | ≠                             |
| CB2R                            |        |        |     |       |                                 |            |                               |                             | ↓       | ↑                   |                    | ≠                             |
